# Supplementary material for: Identifying thermal phase transitions of lignin–solvent mixtures using electrochemical impedance spectroscopy
Source: Royal Society of Chemistry journal article supplement (doi:10.1039/c5gc02342d), 2015-11-26
Supplement: c5gc02342d1.pdf [file c5gc02342d1.pdf]

### Electronic Supplemental Information

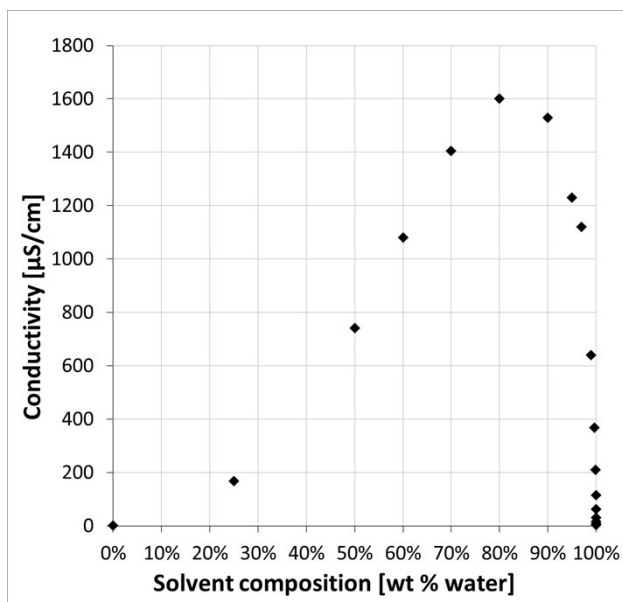

**Figure S1:** Electrical conductivity of acetic acid–water mixtures.<sup>29</sup>
